# Supplementary material for: Pre-ciliated tubal epithelial cells are prone to initiation of high-grade serous ovarian carcinoma
Source: PubMed Central journal article supplement — Nat Commun. 2024 Oct 5;15:8641. doi: 10.1038/s41467-024-52984-1 (PMC11452611; doi:10.1038/s41467-024-52984-1), 2024-10-05
Supplement: 41467_2024_52984_MOESM1_ESM.pdf [file 41467_2024_52984_MOESM1_ESM.pdf]

## **Supplementary Information**

Pre-ciliated tubal epithelial cells are prone to initiation of high-grade serous ovarian carcinoma

Flesken-Nikitin et al.

## Supplementary Figures

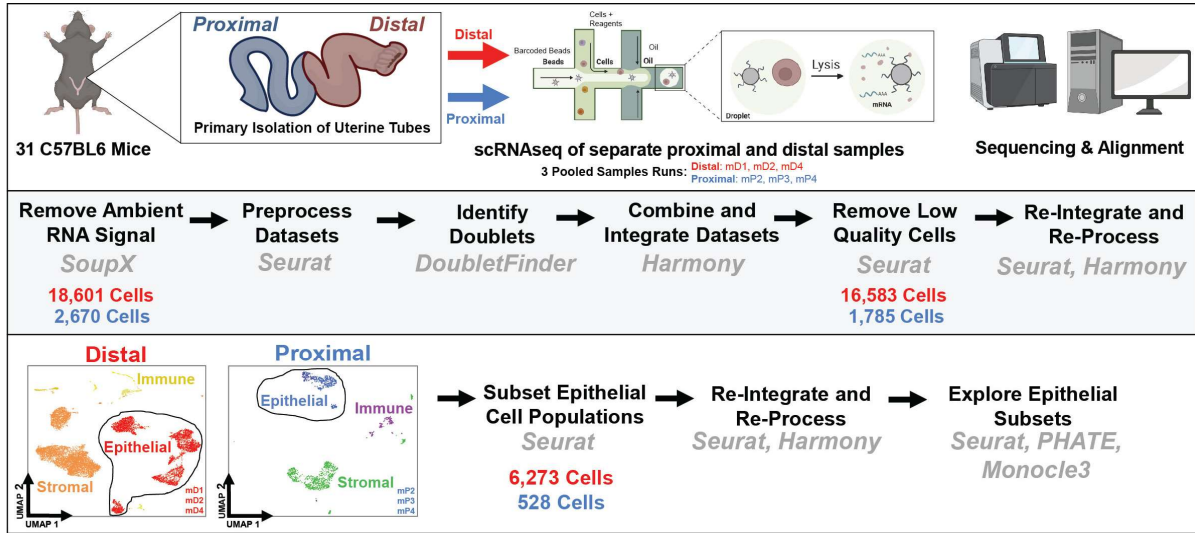

**Supplementary Figure 1. Sample preparation and preprocessing.** After isolation, separation, and dissociation of uterine tubes to single cell suspensions, the RNA from each cell was sequenced and processed *in silico* to make conclusions of the cell states present within the murine uterine tube. The epithelial subsets were created using the circled clusters from either the distal or proximal dataset. Figure was in part created with BioRender.com released under a Creative Commons Attribution-NonCommercial-NoDerivs license.

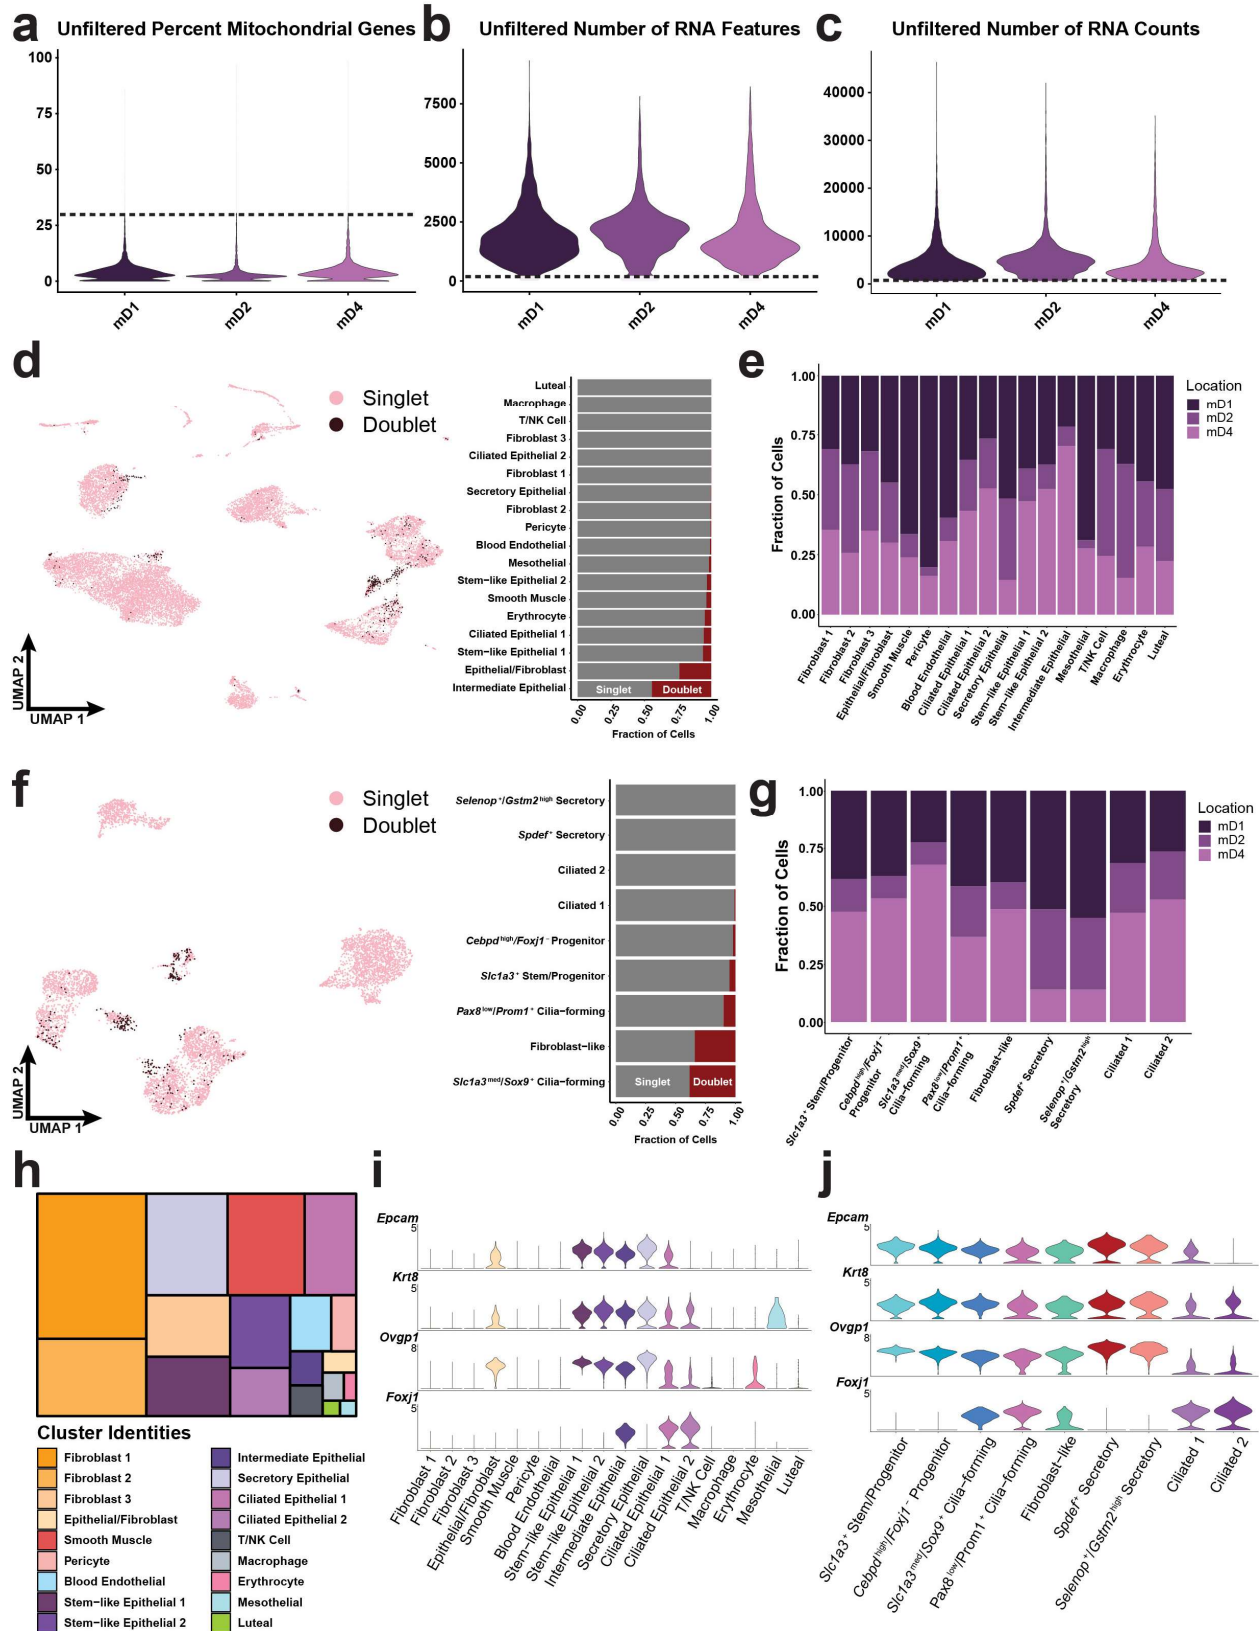

**Supplementary Figure 2. Quality control of distal scRNA seq datasets.** (a) Violin plot demonstrating mitochondrial gene percentage among different sample collection batches (mD1,

mD2, and mD4) with a cutoff of greater than 30%. **(b)** Violin plot demonstrating unique RNA features detected in each cell among different sample collection batches with a cutoff of less than 200. **(c)** Violin plot demonstrating total RNA counts detected in each cell among different sample collection batches with a cutoff of less than 750. **(d)** Doublets detected among cell clusters identified within the complete distal uterine tube dataset. **(e)** Distribution of different sample collection batches attributing to each cluster from the total distal uterine tube dataset. **(f)** Doublets detected among cell clusters identified within the distal epithelial subset. **(g)** Distribution of different sample collection batches attributing to each cluster from the distal epithelial subset. **(h)** Tile mosaic visualization of the relative distribution of cell types present within the distal dataset. **(i and j)** Violin plots of epithelial markers (*Epcam* and *Krt8*), and secretory (*Ovgp1*) and ciliated (*Foxj1*) markers within all distal cells (i) and within the distal epithelial subset (j). Source data are provided as a Source Data file.

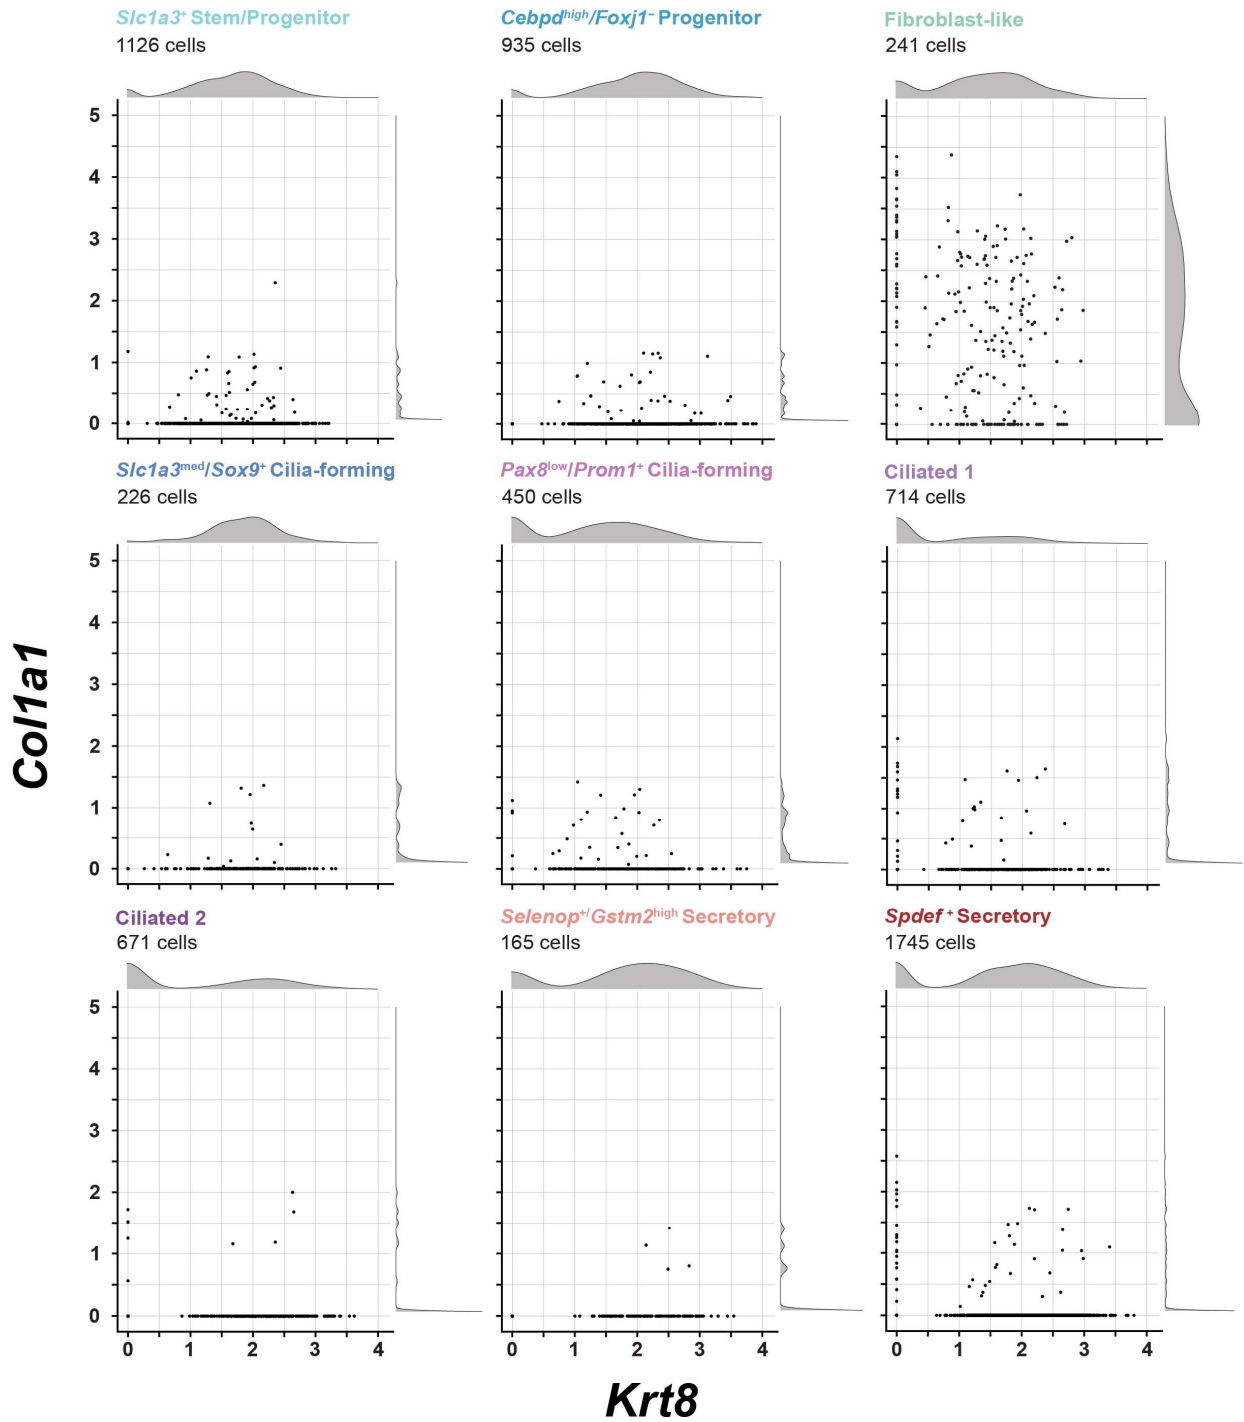

**Supplementary Figure 3. Doublet detection of fibroblast and epithelial markers.** Expression of fibroblast marker (*Col1a1*) and epithelial marker (*Krt8*) among epithelial subset clusters.

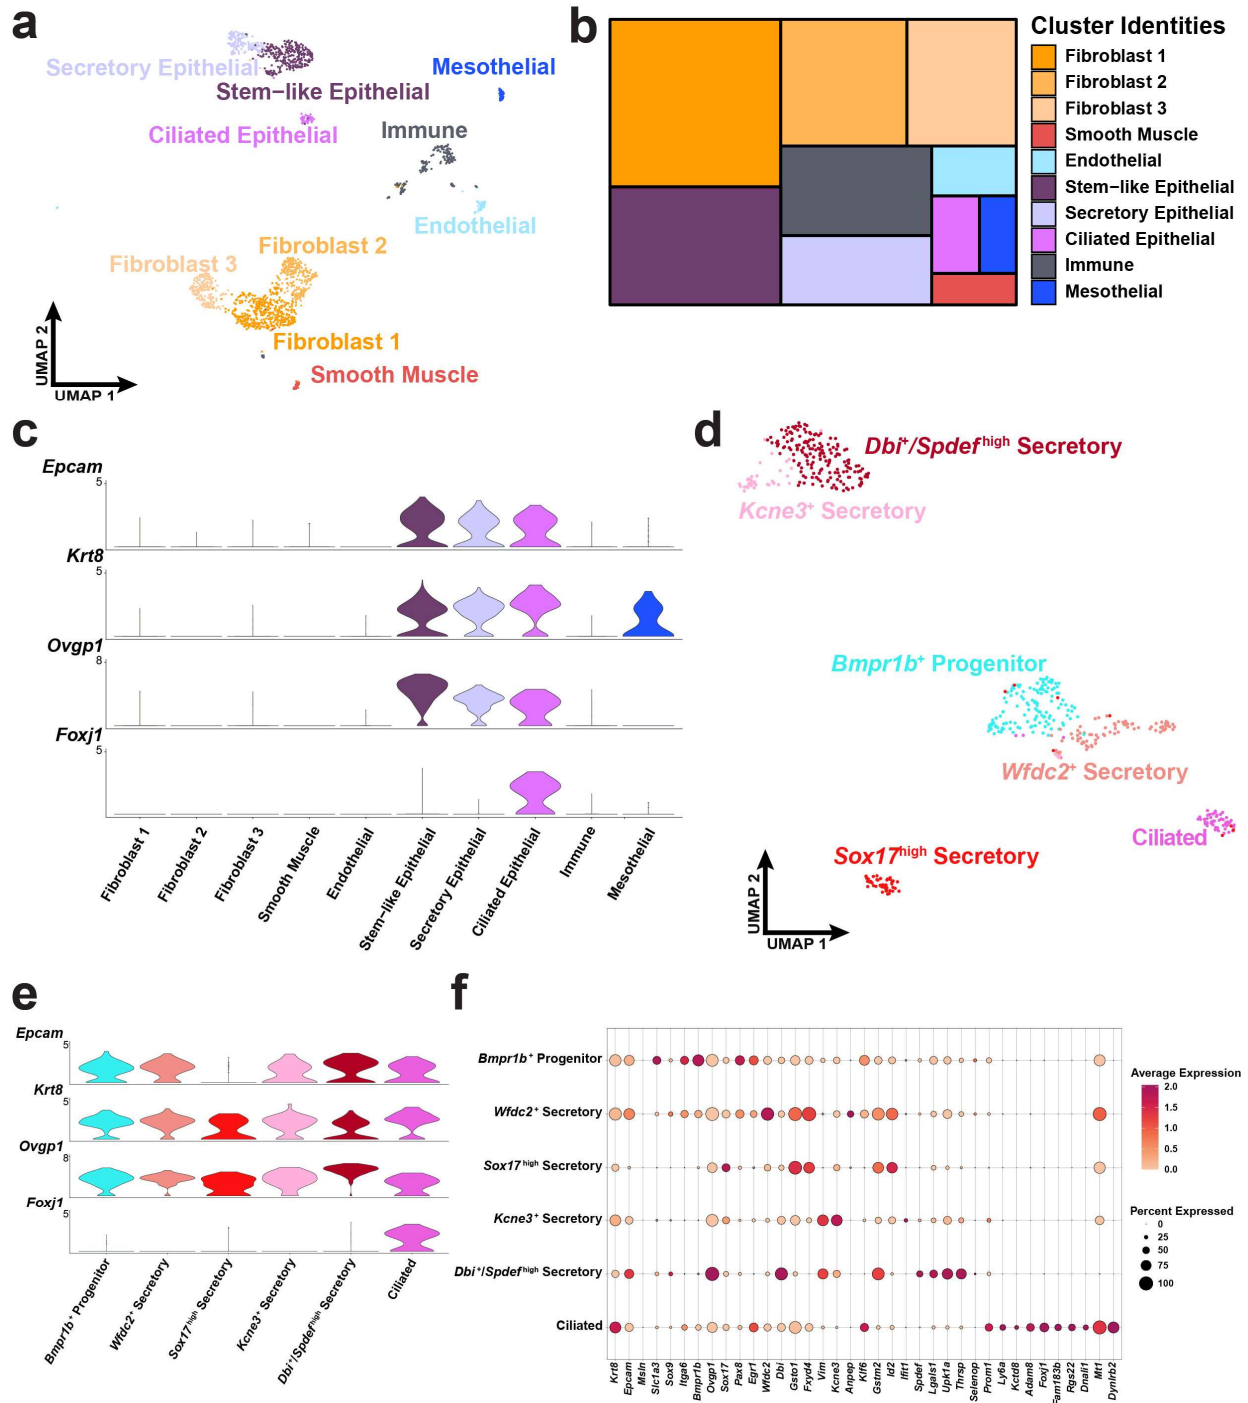

**Supplementary Figure 4. Proximal uterine tube cell atlas.** (a) Visualization of 1,785 high quality proximal cells from 62 uterine tubes within a UMAP embedding. (b) Tile mosaic visualization of the relative distribution of cell types present within the proximal dataset. (c) Violin plots of epithelial markers (*Epcam* and *Krt8*), and secretory (*Ovgp1*) and ciliated (*Foxj1*) markers within all proximal cells. (d) Epithelial cells were identified by their *Epcam* and *Krt8* expression and a subset of the remaining 528 epithelial cells were represented within the UMAP. (e) Violin plots of epithelial markers (*Epcam* and *Krt8*), and secretory (*Ovgp1*) and ciliated (*Foxj1*) markers

within all epithelial proximal cells. **(f)** Dot plot representation of genes associated with the proximal epithelial cells to justify cell state identification. Source data are provided as a Source Data file.

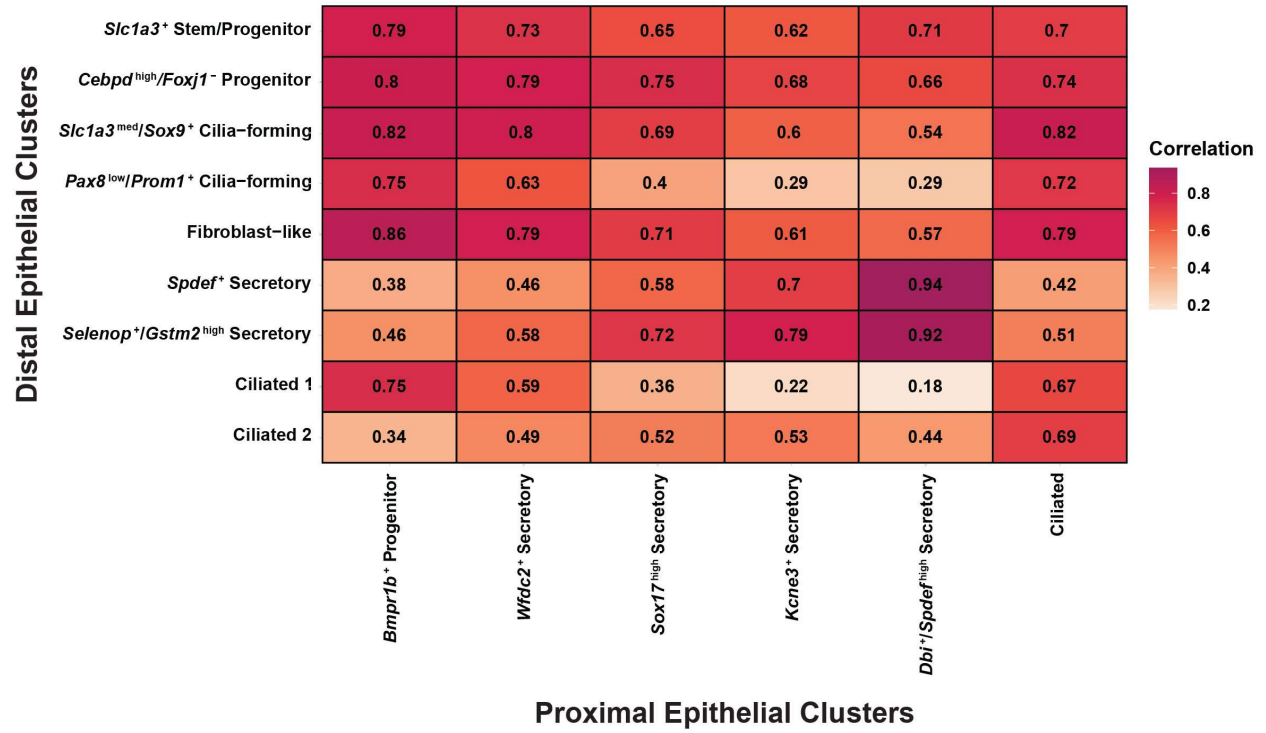

**Supplementary Figure 5. Distal and proximal epithelial cell correlation.** Correlation matrix comparing the average expression profiles of the distal and proximal epithelial clusters.



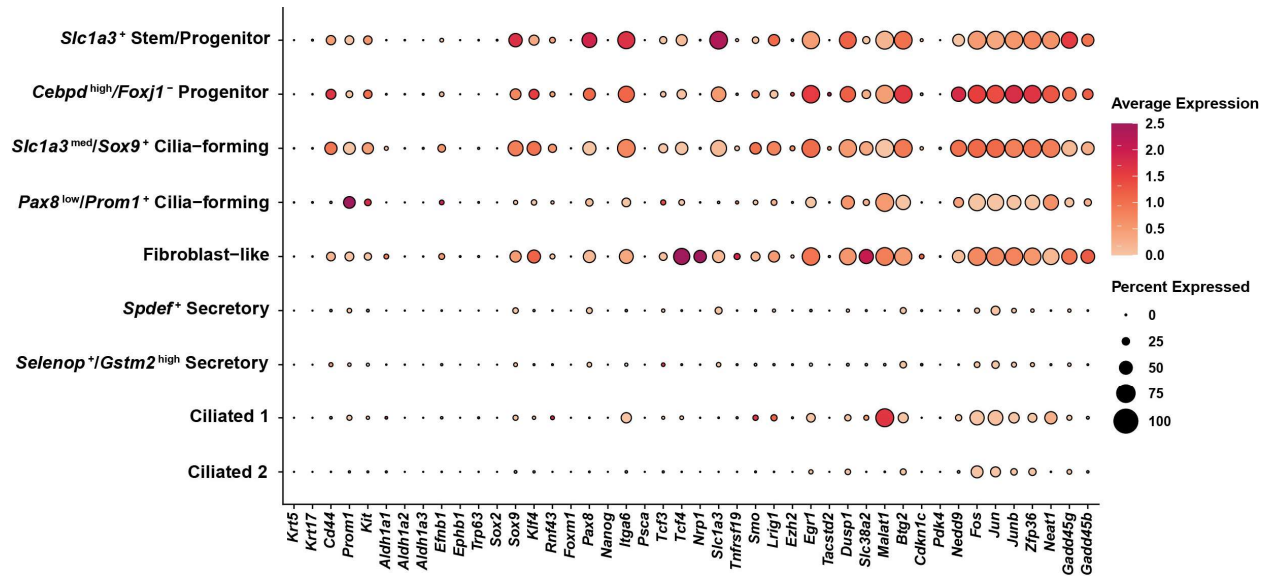

**Supplementary Figure 6. General stem cell marker expression in epithelial cells.** Markers associated with stemness were compiled and used to investigate which epithelial cell clusters may be stem-like. Source data are provided as a Source Data file.

**a**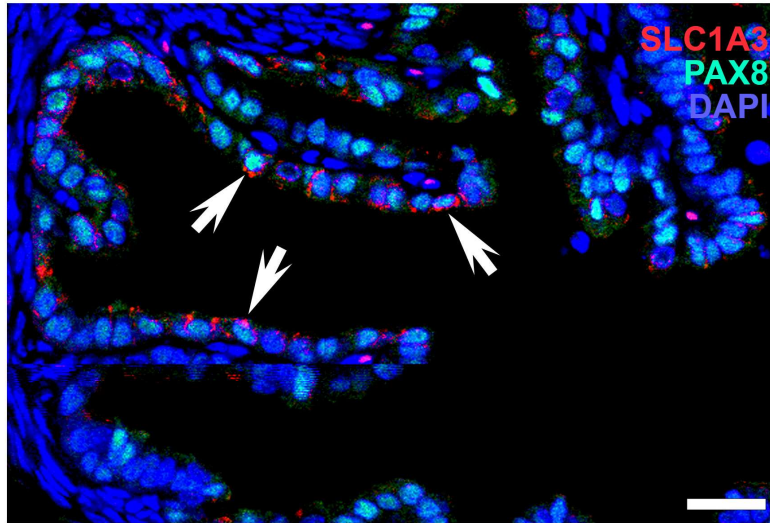**b**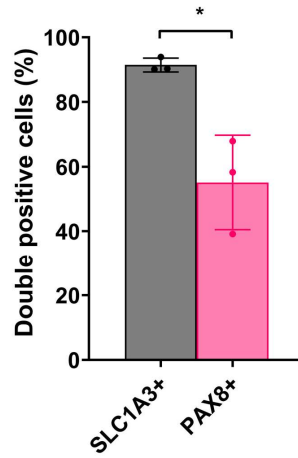

**Supplementary Figure 7. PAX8 labels subset of SLC1A3+ cells.** (a) SLC1A3+ cells (red) are contained for nuclear PAX8 (green), in the distal region of the uterine tube. Arrows indicate cells co-expressing PAX8 and SLC1A3. Counterstaining with DAPI. Scale bar represents 20  $\mu$ m for all images. (b) Frequency of SLC1A3 expression in PAX8+ cells (SLC1A3+) and PAX8 expression in SLC1A3+ cells (PAX8+). \* $P=0.0131$ , two-tailed unpaired t-test. Data are presented as mean values  $\pm$  SD. Biological replicates (12 week-old mice)  $n=3$  in each group (a and b). Source data are provided as a Source Data file.

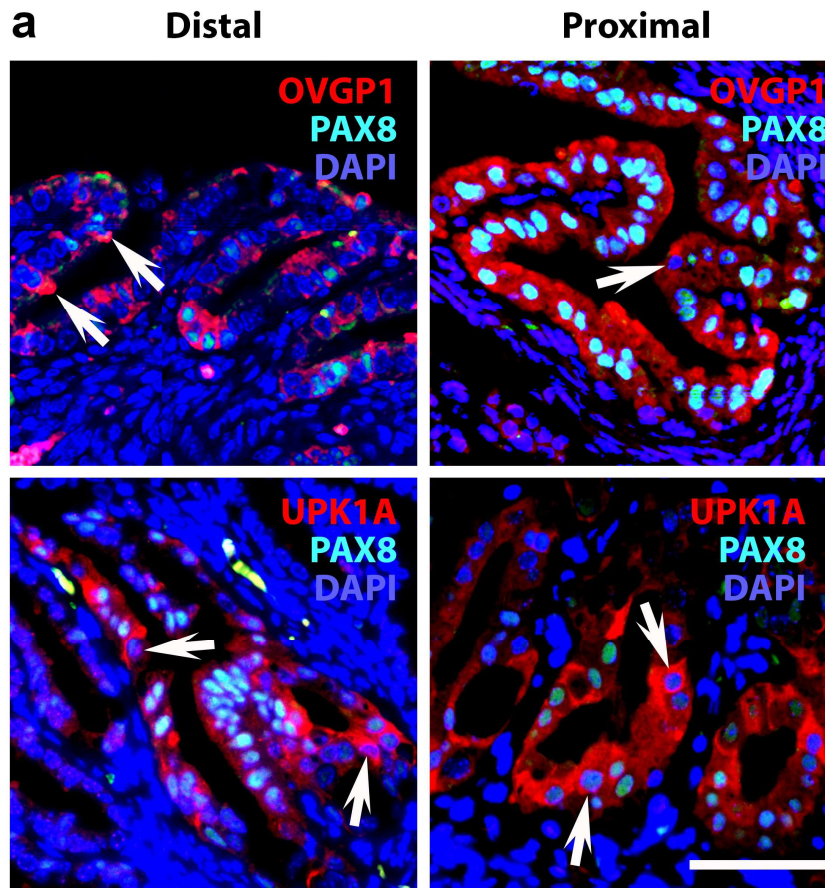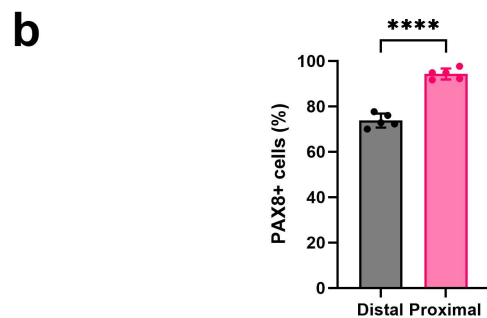

**Supplementary Figure 8. Expression of PAX8 in secretory cells.** (a) Secretory cells are detected by markers OVGP1 and UPK1A in both distal and proximal regions of the uterine tube. Arrows indicate secretory cells without detectable PAX8 expression. Counterstaining with DAPI. Scale bar represents 50  $\mu$ m for all images. (b) Frequency of PAX8+ expression in OVGP1+ cells. Biological replicates (12 week-old mice) n=5 in each group (a and b). \*\*\*\*P < 0.0001 two-tailed unpaired t-test. Data are presented as mean values +/- SD. Source data are provided as a Source Data file.

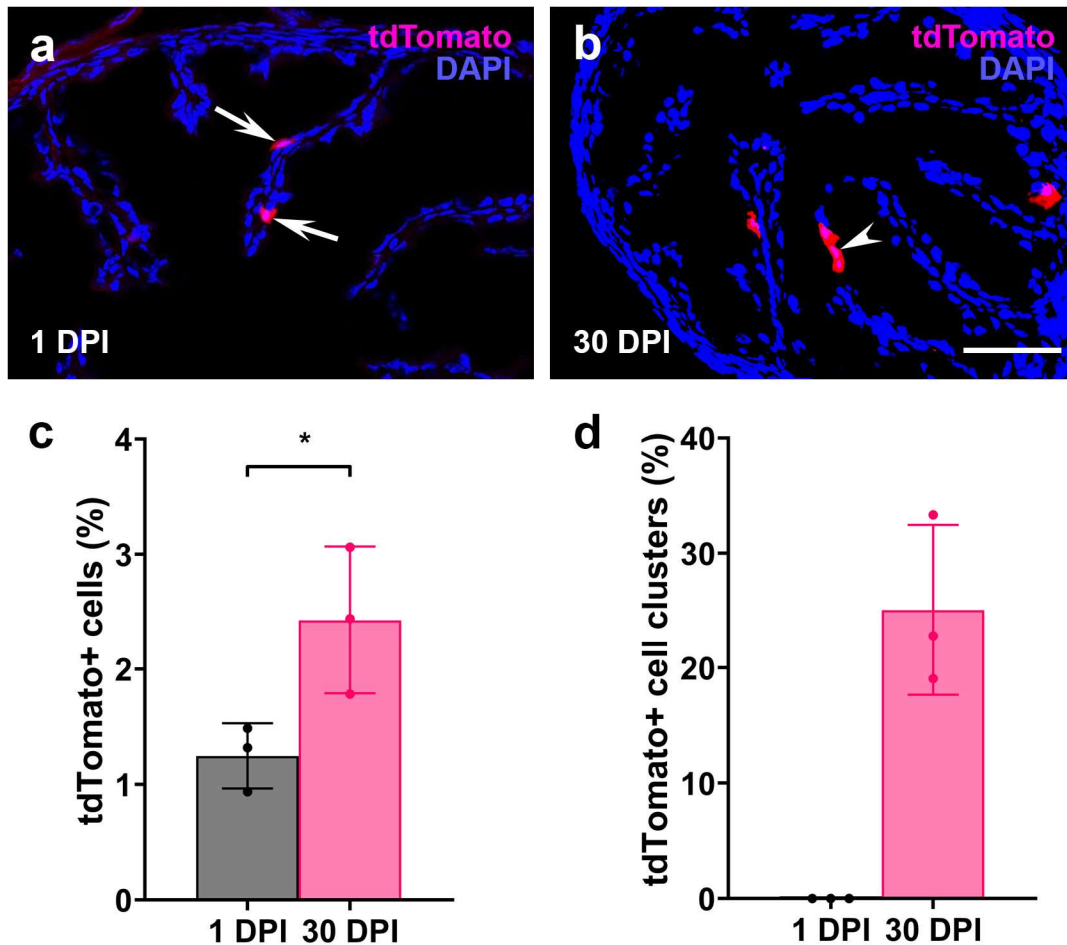

**Supplementary Figure 9. Tracing fate of *Slc1a3*<sup>+</sup> stem/progenitor cells after administration of a single low dose (10 µg/bw) of tamoxifen.** (a and b) tdTomato expression (red) 1 (a) and 30 (b) days after injection (DPI) of tamoxifen. Counterstaining with DAPI. Arrows in a indicate single tdTomato<sup>+</sup> cells. Arrowhead indicates 3 cell tdTomato<sup>+</sup> cluster. Scale bar represents 50 µm for both images. (c) Quantification of cells expressing tdTomato in the distal region of the uterine tube 1 and 30 DPI. (d) Frequency of clusters containing ≥2 adjacent tdTomato<sup>+</sup> cells. \*P= 0.043, two-tailed unpaired t-test. No clusters were observed at 1 DPI. Data are presented as mean values +/- SD. Biological replicates n=3 in each group (a-d). Source data are provided as a Source Data file.

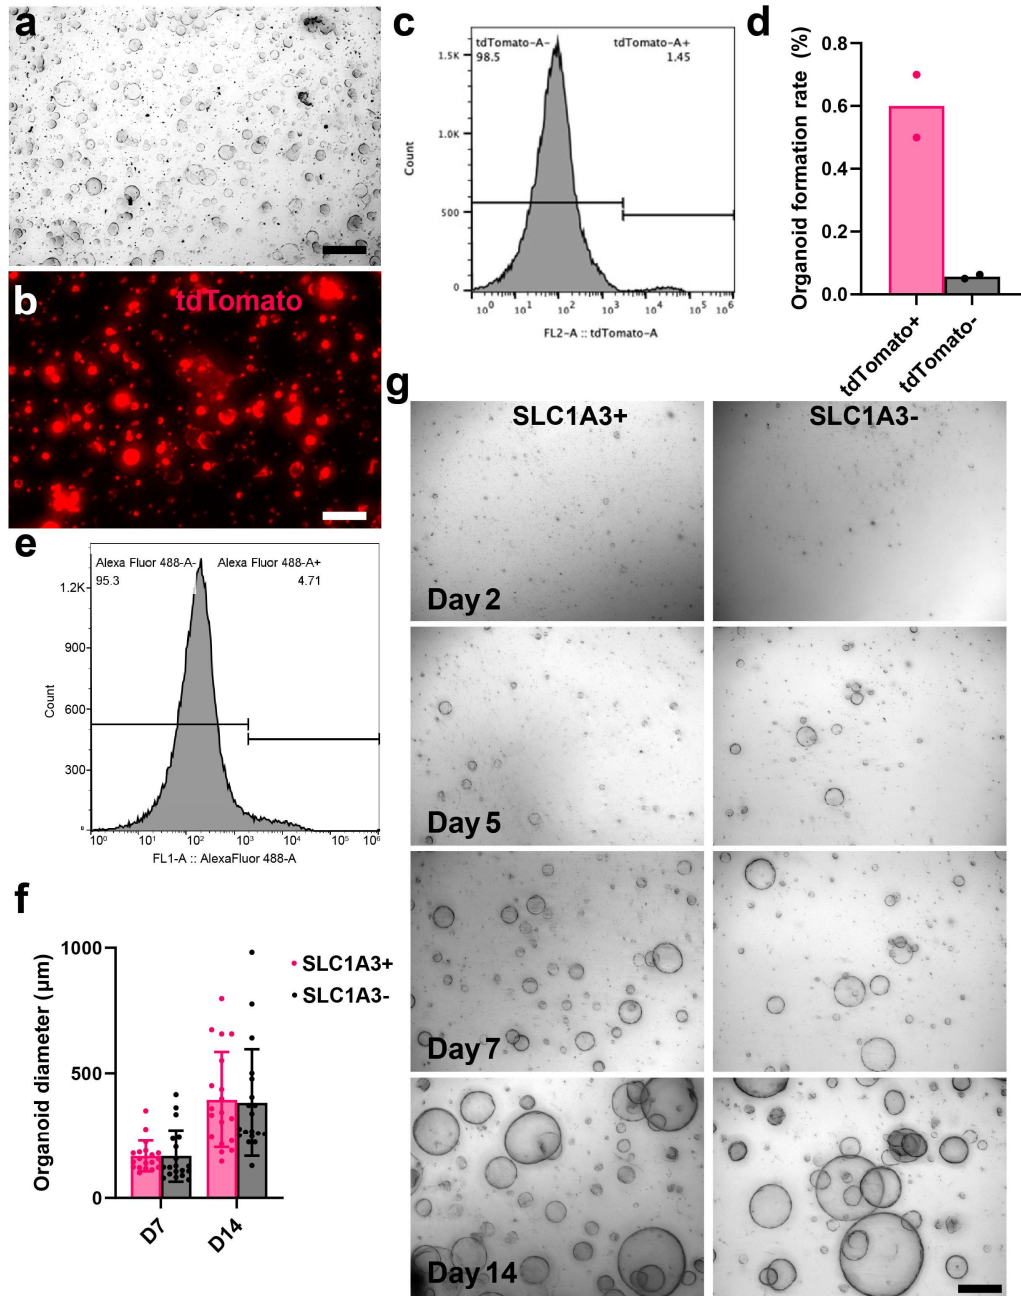

**Supplementary Figure 10. Tubal epithelium (TE) organoid formation.** (a-b) Organoid formation by distal TE cells isolated from *Slc1a3-CreERT Ai9* mice and treated with tamoxifen. Phase contrast (a) and tdTomato fluorescence (red, b). (c) Representative histogram of tdTomato+ TE cells separated by FACS 36 hours after tamoxifen administration. (d) Quantification of organoid formation rate of TE cells separated for tdTomato expression by FACS. Biological replicates n=2. (e) Representative histogram of SLC1A3+ TE cells separated by MACS. (f) Organoid size measured 7 days and 14 days between SLC1A3+ and SLC1A3- cells from two MACS experiments (n=19). (g) Representative images of SLC1A3+ and SLC1A3- organoids 2, 5, 7, and 14 days after isolation from a single MACS experiment. Scale bar represents 170 µm (a and b) and 500 µm (g). Source data are provided as a Source Data file.

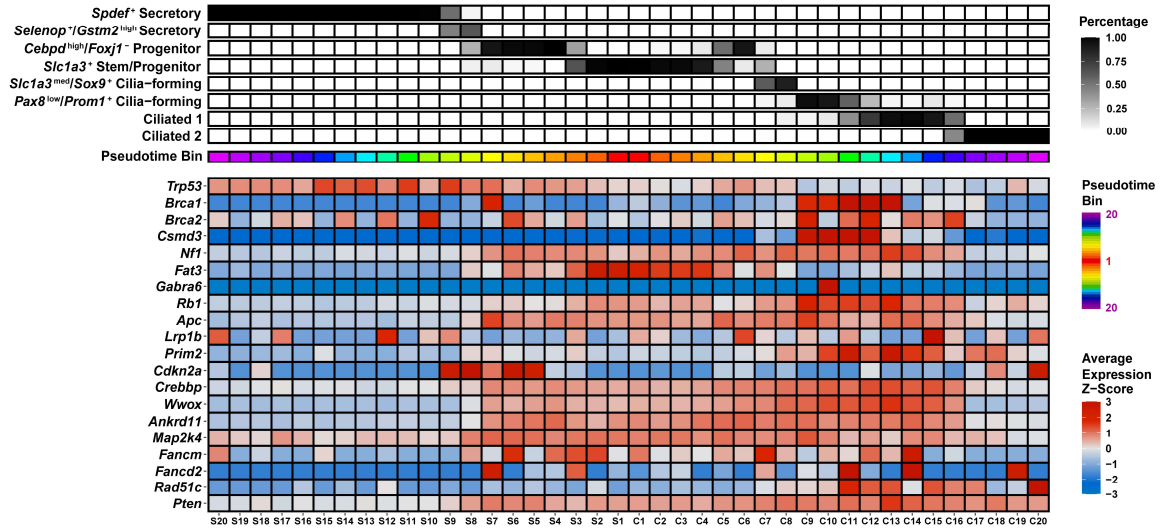

**Supplementary Figure 11. Expression of putative HGSC driver genes along inferred pseudotime trajectories of secretory and ciliated epithelial cell lineages.** The average z-scored expression was calculated for each gene. Each pseudotime bin is equally sized and consists of about 150 cells. Driver genes were derived from the Cancer Genome Atlas Research Network. Most genes, except for FANCM and APC were found to be significantly mutated or deleted in HGSC tumors by TCGA<sup>1,2</sup>. Source data are provided as a Source Data file.



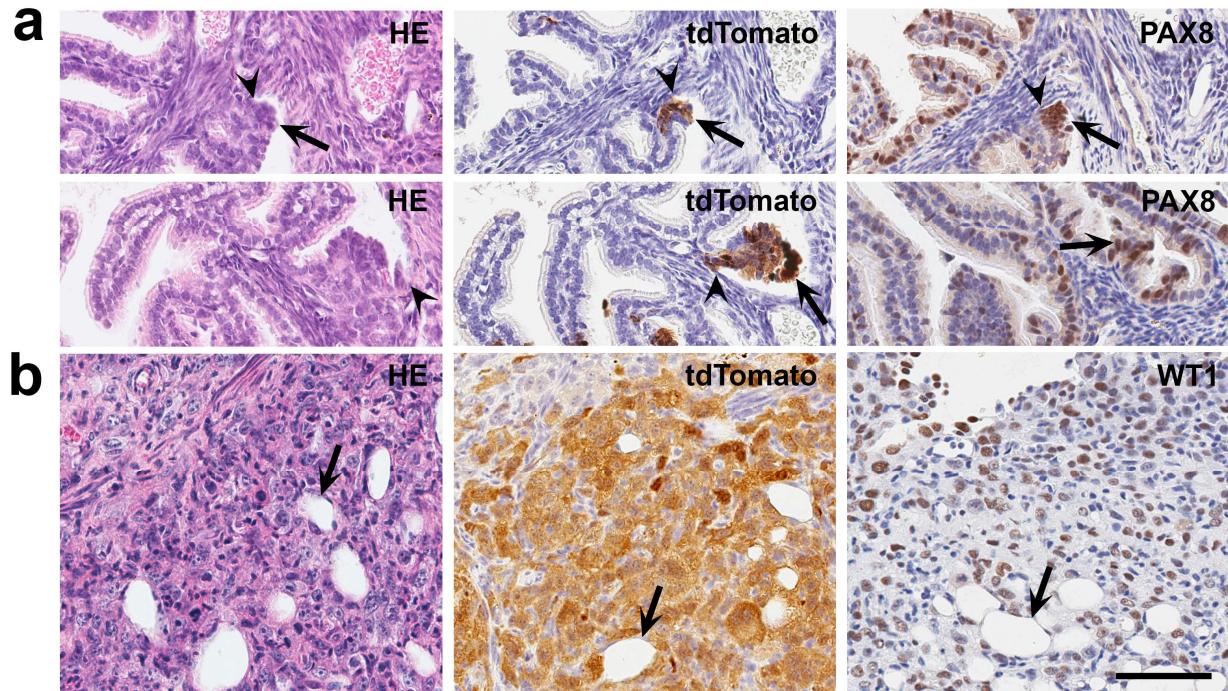

**Supplementary Figure 12. Neoplastic lesions in *Krt5-CreERT Trp53<sup>loxP/loxP</sup> Rb1<sup>loxP/loxP</sup> Ai9* mice. (a) Early lesions (arrows) located at TE-mesothelial junctions. (b) Invasion of ovarian fat pad (arrows). Hematoxylin and Eosin (HE) staining and immunostaining for tdTomato, PAX8 and Wilms Tumor 1 (WT1). Elite ABC method, hematoxylin counterstaining. Scale bar, 60  $\mu$ m for all images. Biological replicates n=5 (a) and n=3 (b).**

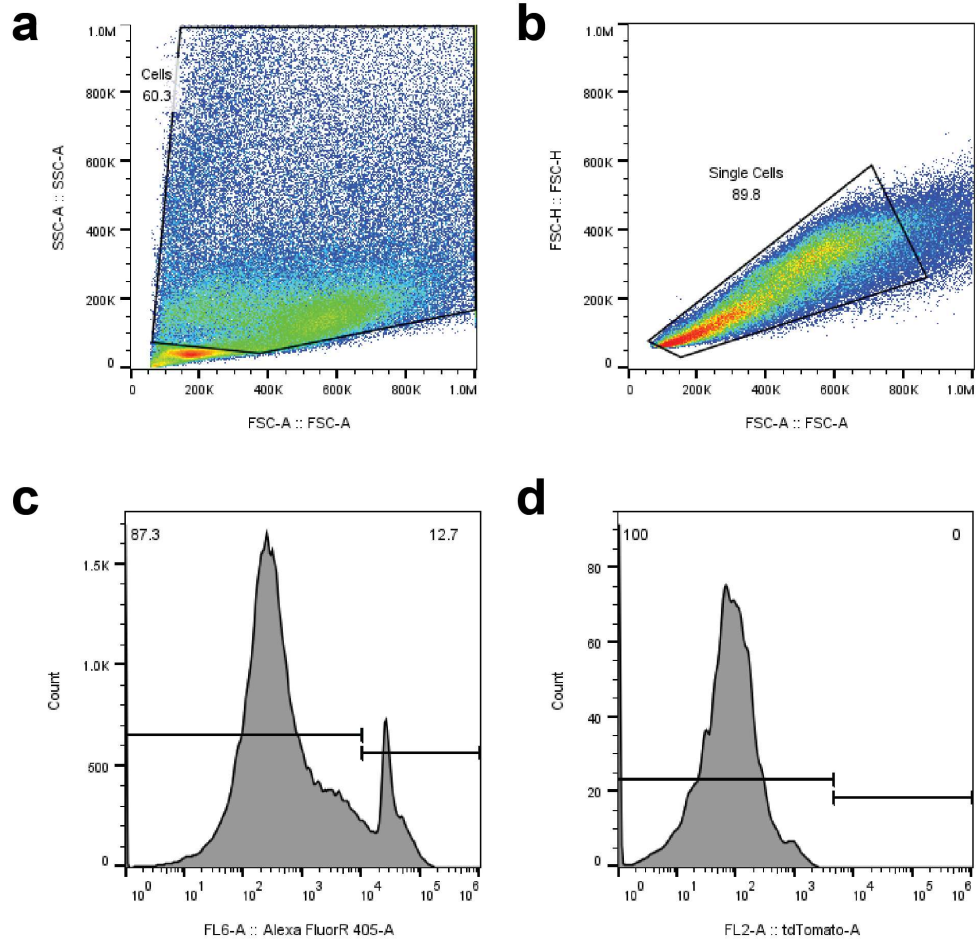

**Supplementary Figure 13. Gating strategy for tdTomato<sup>+</sup> TE cells.** (a) Forward scatter (FSC) and side scatter (SSC) gating strategy for removal of debris within distal TE cells isolated from Slc1a3-CreERT Ai9 mice after tamoxifen treatment. (b) FSC gating for single cell purification. (c) SYTOX Blue dead cell staining to remove positively stained dead cells. (d) Counts for tdTomato<sup>+</sup> distal TE cells isolated from Ai9H mice after tamoxifen treatment as a negative control.



**Supplementary Table 1.**  
Frequency of cell types in the uterine tube

| Cell States                                                           | Total Cells |            | Total <i>Pax8</i> <sup>+</sup> Cells |            |
|-----------------------------------------------------------------------|-------------|------------|--------------------------------------|------------|
|                                                                       | N           | % of Total | N                                    | % of Total |
| <b>Distal Tubal Epithelium</b>                                        |             |            |                                      |            |
| Individual Clusters                                                   |             |            |                                      |            |
| Ciliated 1                                                            | 714         | 11.38      | 20                                   | 2.80       |
| Ciliated 2                                                            | 671         | 10.70      | 26                                   | 3.87       |
| <i>Pax8</i> <sup>low</sup> / <i>Prom1</i> <sup>+</sup> Cilia-forming  | 450         | 7.17       | 168                                  | 37.33      |
| <i>Slc1a3</i> <sup>med</sup> / <i>Sox9</i> <sup>+</sup> Cilia-forming | 226         | 3.60       | 163                                  | 72.12      |
| <i>Slc1a3</i> <sup>+</sup> Stem/Progenitor                            | 1126        | 17.95      | 917                                  | 81.44      |
| <i>Cebpd</i> <sup>high</sup> / <i>Dbi</i> <sup>+</sup> Progenitor     | 935         | 14.91      | 602                                  | 64.39      |
| <i>Selenop</i> <sup>+</sup> / <i>Gstm2</i> <sup>high</sup> Secretory  | 165         | 2.63       | 35                                   | 21.21      |
| <i>Spdef</i> <sup>+</sup> Secretory                                   | 1745        | 27.82      | 492                                  | 28.19      |
| Fibroblast-like                                                       | 241         | 3.84       | 158                                  | 65.56      |
| Total                                                                 | 6273        | 100        | 2581                                 | 41.14      |
| Cell Type Groupings                                                   |             |            |                                      |            |
| All ciliated and cilia forming cells                                  | 2061        | 32.86      | 377                                  | 18.29      |
| All secretory cells                                                   | 1910        | 30.45      | 527                                  | 27.59      |
| <i>Slc1a3</i> <sup>+</sup> Stem/Progenitor cells                      | 1126        | 17.95      | 917                                  | 81.44      |
| Transitional cilia-forming cells                                      | 676         | 10.78      | 331                                  | 48.96      |
| <b>Proximal Tubal Epithelium</b>                                      |             |            |                                      |            |
| Individual Clusters                                                   |             |            |                                      |            |
| Ciliated                                                              | 55          | 10.42      | 16                                   | 29.09      |
| <i>Bmp1rb</i> <sup>+</sup> Progenitor                                 | 130         | 24.62      | 88                                   | 67.69      |
| <i>Wfdc2</i> <sup>+</sup> Secretory                                   | 80          | 15.15      | 49                                   | 61.25      |
| <i>Sox17</i> <sup>high</sup> Secretory                                | 50          | 9.47       | 11                                   | 22.00      |
| <i>Kcne3</i> <sup>+</sup> Secretory                                   | 41          | 7.77       | 6                                    | 14.63      |
| <i>Dbi</i> <sup>+</sup> / <i>Spdef</i> <sup>high</sup> Secretory      | 172         | 32.58      | 35                                   | 20.35      |
| Total                                                                 | 528         | 100        | 205                                  | 38.83      |
| Cell Type Groupings                                                   |             |            |                                      |            |
| All ciliated and cilia forming cells                                  | 55          | 10.42      | 16                                   | 29.09      |
| All secretory cells                                                   | 343         | 64.96      | 101                                  | 29.45      |
| Progenitor cells                                                      | 130         | 24.62      | 88                                   | 67.69      |

**Supplementary Table 2.**

Impact of tamoxifen administration on frequency of SLC1A3+ cells

| Compound | Tamoxifen    | Oil          |
|----------|--------------|--------------|
| 1 DPI#   | 18.07 ± 5.63 | 19.00 ± 4.29 |
| 30 DPI   | 18.04 ± 5.36 | 17.89 ± 2.81 |

\*Oil administration instead of Tamoxifen

# DPI, days post injection

Mean ± s.d., n=3 for tamoxifen 1 DPI and Oil 1 and 30 DPI, n=4 for tamoxifen 30 DPI.

**Supplementary Table 3.**

Magnetic-activated cell sorting (MACS) for organoid-forming SLC1A3+ and SLC1A3- cells.

| Fractions*              | Total cells ( $\pm$ s.d.)               | Fraction of total cells (%) |
|-------------------------|-----------------------------------------|-----------------------------|
| After primary isolation | $5.66 \times 10^5 \pm 1.47 \times 10^5$ | 100                         |
| After stromal removal   | $2.76 \times 10^5 \pm 0.65 \times 10^5$ | 48.8                        |
| SLC1A3+ cells           | $0.20 \times 10^5 \pm 0.13 \times 10^5$ | 3.5                         |
| SLC1A3- cells           | $2.55 \times 10^5 \pm 0.49 \times 10^5$ | 45.1                        |

\*Total cells and percentages were determined by cell counts made from cell fractions at different stages of MACS preparation.

**Supplementary Table 4.**Neoplastic TE lesions after Cre-*LoxP* mediated inactivation of *Trp53* and *Rb1*

| Promoter                 | <i>Slc1a3</i> | <i>Pax8</i> | <i>Krt5</i> |
|--------------------------|---------------|-------------|-------------|
| Cases, N                 | 19            | 21          | 21          |
| First detection (DPI)    | NA*           | 154         | 104         |
| End point (DPI)          | 360           | 400         | 200         |
| Targeted cells (%)#      | 11.91±3.23    | 18.89±5.66  | 0.83±0.49   |
| Mice with TE lesions (%) | 0             | 58.33       | 76.00       |

\*NA, no applicable, no lesions detected

# According to tdTomato detection in Ai9 mice crossed to "Cre" mice

Mean ± SD, n=6 for *Slc1a3*, n=4 for *Pax8* and *Krt5* each. *Pax8* vs *Krt5* two-tailed unpaired t test P=0.0007.

**Supplementary Table 5.**

Quantification of cells expressing tdTomato in the distal TE and OSE of Krt5-CreERT Ai9 mice at 1 and 30 DPI.

| Epithelium                     | TE        |           | OSE       |           |
|--------------------------------|-----------|-----------|-----------|-----------|
| DPI                            | 1         | 30        | 1         | 30        |
| Labeled cells (%) <sup>*</sup> | 0.83±0.49 | 4.29±1.64 | 0.20±0.04 | 0.14±0.02 |
| N                              | 4         | 3         | 4         | 4         |

\*Mean ± SD,

Two-tailed unpaired t tests:

TE 1 DPI vs TE 30 DPI P=0.0094, OSE 1 DPI vs OSE 30 DPI P=0.031

TE 1 DPI vs OSE, 1 DPI P=0.0426, TE 30 DPI vs OSE 30 DPI P=0.003

**Supplementary Table 6.**  
List of genotyping primers.

| Mouse strain*                    | Gene detected | Primer name    | Sequence (5' → 3')                                     | PCR products    |
|----------------------------------|---------------|----------------|--------------------------------------------------------|-----------------|
| Rosa-loxP-stop-loxP-tdTomato/Ai9 | Ai9           | Ai9-1          | AAGGGAGCTGCAGTGGAGTA                                   | 297bp-Wild type |
|                                  |               | Ai9-2          | CCGAAAATCTGTGGGAAGTC                                   |                 |
|                                  |               | Ai9-3          | GGCATTAAAGCAGCGTATCC                                   |                 |
|                                  |               | Ai9-4          | CTGTTCTGTACGGCATGG                                     |                 |
| K5-Cre-ERT2                      | <i>Cre</i>    | Cre5'<br>Cre3' | GGACATGTTTCAGGGATCGCCAGGC<br>GCATAACCAGTGAAACAGCATTGCT | 269bp-Mutant    |
| Pax8-rtTA                        | <i>rtTA</i>   | F-rtTA         | GGTATCGAAGGCCTGACGACAAGGAA                             | 324bp-Wild type |
|                                  |               | R-rtTA         | AGTCTTGCCATGACTCGCCTTCCA                               |                 |
|                                  |               | F-con          | CTAGGCCACAGAATTGAAAGATCT                               |                 |
|                                  |               | R-con          | GTAGGTGGAAATTCTAGCATCATCC                              |                 |
| <i>Rb1<sup>loxP/loxP</sup></i>   | <i>Rb1</i>    | Rb212          | CGAAAGGAAAGTCAGGGACATTGGG                              | 295bp-Floxed    |
|                                  |               | Rb183'         | GGAATTCCGGCGTGTGCCATCAATG                              | 247bp-Wild type |
|                                  |               | Rb19E          | AGCTCTCAAGAGCTCAGACTCATGG                              | 269bp-Knockout  |
| Slc1a3-CreERT                    | <i>Slc1a3</i> | 10112          | ACAATCTGGCCTGCTACCAAAGC                                | 200bp-Wild type |
|                                  |               | 10110          | CCAGTGAAACAGCATTGCTGTC                                 | 600bp-Mutant    |
|                                  |               | F-8744         | CAAATGTTGCTTGTCTGGTG                                   |                 |
|                                  |               | R-8745         | GTCAGTCGAGTGCAAGTTT                                    |                 |
| Tre-Cre                          | <i>Cre</i>    | Cre5'<br>Cre3' | GGACATGTTTCAGGGATCGCCAGGC<br>GCATAACCAGTGAAACAGCATTGCT | 269bp-Mutant    |
| <i>Trp53<sup>loxP/loxP</sup></i> | <i>Trp53</i>  | P531F5'        | GTGCCCTCCGTCCTTTTTTCGCAATC                             | 316bp-Floxed    |
|                                  |               | P5310F5'       | GTTAAGGGGTATGAGGGACAAGGTA                              | 163bp-Wild type |
|                                  |               | P53102.3'      | CCATGAGACAGGGTCTTGCTATTGT                              | 198bp-Knockout  |

\*See Methods for strain descriptions.

**Supplementary Table 7.**

List of antibodies used for immunostaining\*

| <b>Antigen, conjugation</b>  | <b>Antibody source, catalogue number</b> | <b>Clone</b>        | <b>Lot. number</b> | <b>Host</b> | <b>Retrieval</b> | <b>Dilution</b>                |
|------------------------------|------------------------------------------|---------------------|--------------------|-------------|------------------|--------------------------------|
| Acetylated $\alpha$ -tubulin | Sigma-Aldrich, T7451                     | 6-11B-1             | 103M4772V          | Mouse       | Citrate          | 1:200 (IF#)                    |
| CD140a                       | Biolegend, 135910                        | APA5                | B376160            | Rat         |                  | (MACS <sup>s</sup> )           |
| CD31                         | Biolegend, 102503                        | MEC13.3             | B379519            | Rat         |                  | (MACS)                         |
| CD45                         | Biolegend, 103103                        | 30-F11              | B394828            | Rat         |                  | (MACS)                         |
| FAM183B                      | Invitrogen, PA5-71109                    | PC <sup>&amp;</sup> | ZE4342976          | Rabbit      |                  | 1:150 (IF)                     |
| FOXJ1                        | Novus Biologicals, AF3619-SP             | PC                  | XVG022308          | Goat        |                  | 1:800 (IF)                     |
| Ki67                         | Thermo Fisher, 14-5698-82                | SolA-15             | 2496198            | Rat         | Citrate          | 1:4000 (IHC <sup>†</sup> )     |
|                              |                                          |                     |                    |             | None             | 1:600 (IF)                     |
| OVGP1                        | Abcam, Ab118590                          | PC                  | 1078217-2          | Rabbit      | Citrate          | 1:2000-8000 (IHC), 1:800 (IF)  |
| P16                          | Abcam, Ab241543                          | PABLO-33B           | -                  | Rat         | Citrate          | 1:500 (IHC)                    |
| P73                          | Abcam, Ab40658                           | EP436Y              | 1014031-3          | Rabbit      | Citrate          | 1:200 (IF)                     |
| PAX8                         | Proteintech, 60145-4-Ig                  | 4H7B3               | 10003229           | Mouse       | Citrate          | 1:5000-10000 (IHC), 1:100 (IF) |
| PAX8                         | Proteintech, 10336-1-AP                  | PC                  | -                  | Rabbit      | Citrate          | 1:4000 (IHC), 1:400 (IF)       |
| RFP/tdTomato                 | Rockland Immunochemical, 200-101-379     | PC                  | 50005              | Goat        |                  | 1:100 (IF)                     |
| RFP/tdTomato                 | Rockland Immunochemical, 600-401-379S    | PC                  | 48776              | Rabbit      |                  | 1:4000 (IHC), 1:250 (IF)       |
| SLC1A3                       | Novus Biologicals, NB100-1869            | PC                  | D112656-5          | Rabbit      |                  | 1:1000 (IHC), 1:500 (IF)       |
| SLC1A3/EAAT1                 | R&D Systems, AF6048                      | PC                  | CAGI032408A        | Sheep       | Citrate          | 1:75 (IF)                      |
| SLC1A3                       | Novus Biologicals, NB-100-1869B          | PC                  | D160350            | Rabbit      |                  | (MACS)                         |
| TER-119                      | Biolegend, 116203                        | TER-119             | B378223            | Rat         |                  | (MACS)                         |

|                                       |                              |               |         |        |         |                             |
|---------------------------------------|------------------------------|---------------|---------|--------|---------|-----------------------------|
| UPK1 $\alpha$                         | Proteintech,<br>25275-1-AP   | PC            | -       | Rabbit | Citrate | 1:4000 (IHC),<br>1:250 (IF) |
| Wilm's Tumor<br>Protein 1             | Abcam, Ab267377              | EPR-<br>23963 | -       | Rabbit | Citrate | 1:500 (IHC)                 |
| Anti-goat IgG,<br>Alexa Fluor 594     | Invitrogen,<br>A11058        | PC            | 2185074 | Donkey |         | 1:200                       |
| Anti-mouse<br>IgG,<br>biotinylated    | Vector Labs, BA-<br>9200-1.5 | PC            | ZH0819  | Goat   |         | 1:200                       |
| Anti-mouse<br>IgG, Alexa<br>Fluor 488 | Thermo Fisher, A-<br>11001   | PC            | 2714439 | Goat   |         | 1:200                       |
| Anti-rabbit IgG,<br>biotinylated      | Vector Labs, BA-<br>1000-1.5 | PC            | ZG0122  | Goat   |         | 1:200                       |
| Anti-rabbit IgG,<br>Alexa Fluor 488   | Invitrogen,<br>A21206        | PC            | 2072687 | Donkey |         | 1:200                       |
| Anti-rabbit IgG,<br>Alexa Fluor 594   | Thermo Fisher, A-<br>21207   | PC            | 2747441 | Donkey |         | 1:200                       |
| Anti-rat IgG,<br>biotinylated         | Vector Labs,<br>BA-4000-1.5  | PC            | ZJ1101  | Rabbit |         | 1:200                       |
| Anti-sheep IgG,<br>Alexa Fluor 594    | Invitrogen,<br>A11016        | PC            | 2260924 | Donkey |         | 1:200                       |

\*All antibodies were validated by manufacturers.

#IF, Immunofluorescence

§MACS, Magnetic activated cell sorting, all dilutions were 0.5  $\mu$ g of antibody per million cells

&PC: Polyclonal

†IHC, Immunohistochemistry (ABC Elite method)



## Supplementary References

- 1 Yamulla, R. J., Nalubola, S., Flesken-Nikitin, A., Nikitin, A. Y. & Schimenti, J. C. Most Commonly Mutated Genes in High-Grade Serous Ovarian Carcinoma Are Nonessential for Ovarian Surface Epithelial Stem Cell Transformation. *Cell Rep* **32**, 108086 (2020). <https://doi.org/10.1016/j.celrep.2020.108086>
- 2 Network, T. C. G. A. R. Integrated genomic analyses of ovarian carcinoma. *Nature* **474**, 609-615 (2011). <https://doi.org/10.1038/nature10166>
